# Supplementary material
Source: PubMed Central journal article supplement (PMC6872938)
Supplement: NIHMS1540815-supplement-2.pdf [file NIHMS1540815-supplement-2.pdf]

# Supplementary Figure 1

Extended Data Fig. 1d

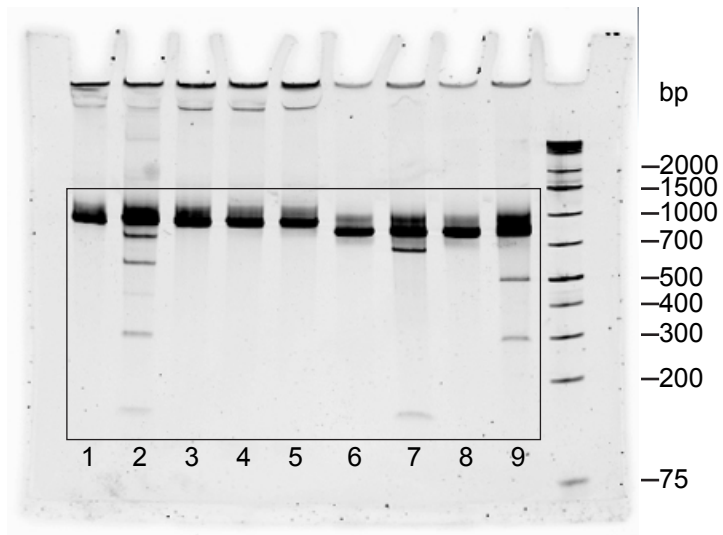

Extended Data Fig. 1e

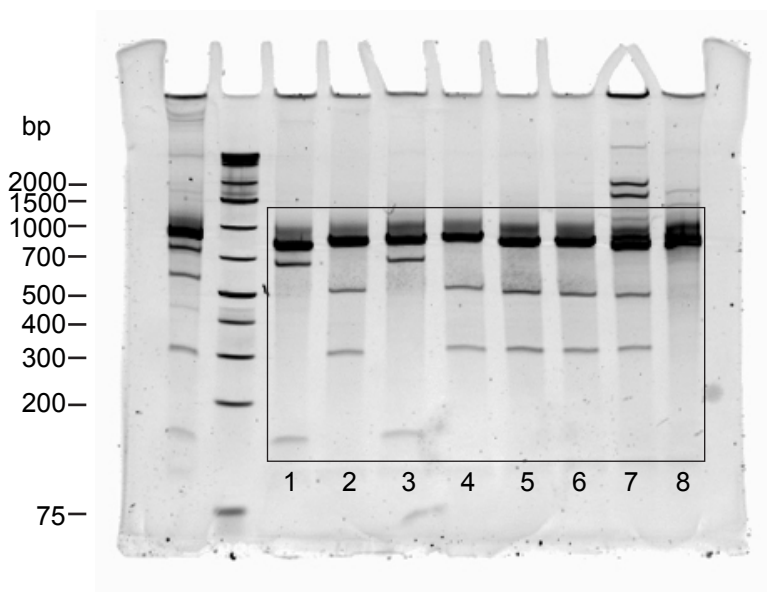

Extended Data Fig. 8c

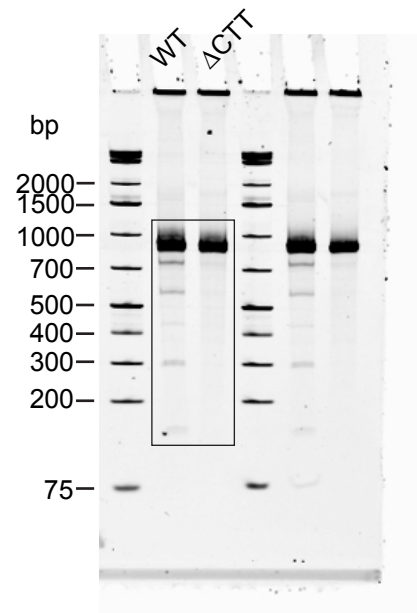

# Supplementary Table 1

The sequences of target site duplications (TSDs) generated by HzTransib mediated transposition

| Colony No. | TSD sequence | Colony No. | TSD sequence |
|------------|--------------|------------|--------------|
| 1          | CGGTG        | 31         | CGATG        |
| 2          | TGGGG        | 32         | TGGCA        |
| 3          | CGGCA        | 33         | CACCG        |
| 4          | AGCCG        | 34         | CGCCG        |
| 5          | CGATG        | 35         | CGTAG        |
| 6          | CGTCG        | 36         | TGCCG        |
| 7          | CGCCG        | 37         | CGTCA        |
| 8          | CATCG        | 38         | CGACG        |
| 9          | AGGCC        | 39         | TAACG        |
| 10         | CGAGG        | 40         | CGCTA        |
| 11         | CCTCG        | 41         | CAACG        |
| 12         | TGCCA        | 42         | CACCC        |
| 13         | GGCCG        | 43         | CGACA        |
| 14         | CGGCA        | 44         | GGCCG        |
| 15         | CGGCA        | 45         | GGGTG        |
| 16         | GGCCG        | 46         | TGCCA        |
| 17         | TGCCG        | 47         | CAACG        |
| 18         | TAGCA        | 48         | CGGCT        |
| 19         | TGTTG        | 49         | CGTCA        |
| 20         | CGCTA        | 50         | CCACA        |
| 21         | CGCCG        | 51         | CGTCG        |
| 22         | CGCCG        | 52         | CGCCG        |
| 23         | CGACG        | 53         | CGACG        |
| 24         | CGCCG        | 54         | CGGGA        |
| 25         | TGCCG        |            |              |
| 26         | CAACG        |            |              |
| 27         | CGCCG        |            |              |
| 28         | TAACG        |            |              |
| 29         | CGACG        |            |              |
| 30         | GGGCG        |            |              |
